# Supplementary material
Source: publisher site journal article supplement (https://www.dovepress.com/get_supplementary_file.php?f=188364S2.xlsx)
Supplement: Supplementary file 1 [file get_supplementary_file.php]

## Sheet: Table S2
Gene ID	Control FPKM	HJC0152 FPKM	log2(HJC0152/Control)	Qvalue(Control-vs-HJC0152)	Pvalue(Control-vs-HJC0152)	Other Gene ID
10008	1.995	0.825	-1.23046	4.61033e-13	2.82998e-13	KCNE3
100128927	8.145	3.845	-1.08115	3.87587e-46	9.78117e-47	ZBTB42
100132074	1.065	0.425	-1.32155	2.91954e-07	2.41646e-07	FOXO6
100132406	2.715	1.3	-1.06152	6.95287e-46	1.76274e-46	NBPF10
100137049	1.16	0.475	-1.28402	7.13698e-08	5.67604e-08	PLA2G4B
10019	6.425	2.84	-1.11201	4.88544e-55	1.04618e-55	SH2B3
100287013	1.985	0.595	-1.55558	0.000316481	0.000329857	FAM86KP
100303755	7.66	2.87	-1.41489	4.62604e-22	2.07501e-22	PET117
100505385	1.05	0.315	-1.74161	2.26391e-09	1.64957e-09	IQCJ-SCHIP1
100526832	1.475	0.46	-1.66925	5.53835e-20	2.6596e-20	PHOSPHO2-KLHL23
100527943	1.74	0.58	-1.58258	1.42526e-06	1.23144e-06	TGIF2-C20orf24
100527978	1.235	0.32	-1.94738	2.71478e-08	2.10204e-08	TMEM56-RWDD3
100528021	0.15	0	-4.63488	0.00031103	0.000323812	ST20-MTHFS
100529241	0.27	0	-6.39635	2.50785e-11	1.66123e-11	HSPE1-MOB4
100885850	0.81	0.175	-2.1913	1.12455e-07	9.04033e-08	PTGES3L-AARSD1
10100	0.73	0.115	-2.71109	2.65318e-14	1.54618e-14	TSPAN2
10188	12.19	5.925	-1.02841	7.4881e-68	1.34245e-68	TNK2
101928212	0.96	0.275	-1.91724	1.02974e-15	5.67198e-16	LOC101928212
10218	0.37	0.01	-4.93946	1.46097e-08	1.11268e-08	ANGPTL7
102724624	0.8	0.375	-1.09976	0.000793285	0.000861876	LOC102724624
102724751	2.98	1.205	-1.40265	1.58202e-07	1.28242e-07	LOC102724751
10331	14.275	4.915	-1.55254	1.22741e-89	1.71168e-90	B3GNT3
10392	2.05	0.535	-1.85033	4.46681e-30	1.6016e-30	NOD1
10398	675.23	322.02	-1.07542	0	0	MYL9
1040	8.025	3.585	-1.1691	3.35311e-64	6.32768e-65	CDS1
1045	23.255	9.95	-1.25828	1.04297e-113	1.1654e-114	CDX2
1048	8.55	3.95	-1.02338	5.89919e-36	1.83035e-36	CEACAM5
10495	2.945	1.35	-1.16576	3.72256e-21	1.71541e-21	ENOX2
10499	2.505	1.14	-1.12868	2.19986e-36	6.771e-37	NCOA2
105370045	2.17	0.705	-1.62269	8.1292e-06	7.41501e-06	LOC105370045
105371591	0.495	0.1	-2.25828	5.94074e-05	5.81918e-05	LOC105371591
105377650	2.4	0.155	-3.92108	1.08881e-45	2.76997e-46	LOC105377650
10622	1.7	0.79	-1.12122	1.25885e-10	8.62525e-11	POLR3G
10634	22.015	9.35	-1.23706	8.9363e-110	1.03764e-110	GAS2L1
10645	11.385	4.1	-1.48837	9.67504e-138	8.84903e-139	CAMKK2
10732	8.28	3.655	-1.1207	8.65581e-37	2.63768e-37	TCFL5
10745	6.005	2.61	-1.27477	3.35036e-37	1.01313e-37	PHTF1
107984152	0.83	0	-7.39652	4.31106e-20	2.05766e-20	LOC107984152
107984512	0.26	0.065	-1.98526	9.95453e-05	9.93526e-05	LOC107984512
107986062	0.4	0.175	-1.18423	5.0493e-05	4.90916e-05	LOC107986062
107986113	1.085	0.32	-1.74405	3.09415e-10	2.16379e-10	LOC107986113
107986724	1.185	0.445	-1.41963	2.30377e-07	1.89134e-07	LOC107986724
107987067	0.5	0.075	-2.69772	4.14124e-05	3.99368e-05	LOC107987067
10817	1.84	0.7	-1.22566	3.58834e-10	2.51828e-10	FRS3
10913	12.68	5.385	-1.23119	1.45147e-98	1.8717e-99	EDAR
10936	1.785	0.71	-1.33144	1.22309e-09	8.81377e-10	GPR75
10970	22.335	9.155	-1.28505	7.69527e-138	7.02706e-139	CKAP4
11015	14.485	7.73	-1.00587	8.81008e-33	2.95071e-33	KDELR3
11041	7.455	2.7	-1.46203	3.57968e-39	1.03705e-39	B4GAT1
11059	12.635	5.97	-1.10666	1.84185e-78	2.8829e-79	WWP1
11217	3.46	0.86	-2.01198	1.73258e-92	2.33023e-93	AKAP2
11245	0.58	0.185	-1.57023	7.91803e-09	5.93685e-09	GPR176
112755	0.255	0.085	-1.48834	0.000284925	0.000295553	STX1B
11278	3.37	1.545	-1.32031	2.96631e-58	6.04921e-59	KLF12
112840	6.87	3.395	-1.01185	5.6506e-32	1.93456e-32	WDR89
112849	2.215	0.53	-2.1214	4.37463e-25	1.79381e-25	L3HYPDH
113000	43.1	18.935	-1.19334	1.87959e-151	1.53542e-152	RPUSD1
113235	22.665	7.08	-1.67651	0	0	SLC46A1
114827	0.205	0.065	-1.6581	0.000195445	0.000199742	FHAD1
114991	2.67	1.165	-1.20822	6.0982e-43	1.63769e-43	ZNF618
115	3.68	1.535	-1.2628	6.5121e-57	1.35272e-57	ADCY9
115992	4.065	1.895	-1.08204	3.83838e-20	1.82813e-20	RNF166
116236	5.635	1.65	-1.77139	9.68857e-63	1.87263e-63	ABHD15
116988	36.17	17.96	-1.06301	9.53846e-153	7.7223e-154	AGAP3
1183	2.98	1.33	-1.15032	1.55801e-35	4.89542e-36	CLCN4
118788	2.235	1.09	-1.07386	1.92997e-17	1.00056e-17	PIK3AP1
120227	3.09	0.945	-1.60136	6.70799e-27	2.61166e-27	CYP2R1
122953	2.7	0.47	-2.64298	5.37424e-28	2.03751e-28	JDP2
124222	21.215	10.445	-1.01745	8.07369e-75	1.3332e-75	PAQR4
124930	12.165	4.905	-1.28458	9.79803e-78	1.55219e-78	ANKRD13B
126375	2.045	0.615	-1.74199	9.04808e-27	3.5333e-27	ZNF792
127833	0.105	0.035	-1.66523	0.000924199	0.00101314	SYT2
129607	0.885	0.29	-1.55512	1.97406e-08	1.51612e-08	CMPK2
129642	6.285	3.045	-1.16138	1.10372e-44	2.86586e-45	MBOAT2
130535	1.515	0.625	-1.27899	9.1568e-10	6.55443e-10	KCTD18
130574	1.605	0.585	-1.45064	1.56999e-17	8.11188e-18	LYPD6
131474	6.255	2.14	-1.54116	2.60025e-26	1.02716e-26	CHCHD4
132228	0.365	0.025	-3.92365	5.12385e-06	4.59969e-06	LSMEM2
1326	6.085	2.095	-1.35037	3.54707e-56	7.46122e-57	MAP3K8
133522	0.985	0.15	-2.64966	3.04005e-50	7.09096e-51	PPARGC1B
134	1.34	0.24	-2.43944	1.21028e-19	5.86493e-20	ADORA1
135112	8.29	2.3	-1.83903	1.39134e-143	1.21167e-144	NCOA7
136895	0.56	0.25	-1.20099	5.34803e-05	5.20973e-05	C7orf31
1376	9.37	3.755	-1.30634	3.62223e-55	7.75142e-56	CPT2
138151	16.62	4.85	-1.77571	0	0	NACC2
138199	6.015	2.8	-1.26912	4.55585e-44	1.1989e-44	CARNMT1
138311	0.83	0.415	-1.00305	0.000484995	0.000514761	FAM69B
139285	2.595	1.12	-1.20752	1.06989e-41	2.93254e-42	AMER1
140688	4.585	2.01	-1.65962	1.45582e-57	2.9986e-58	NOL4L
140711	1.14	0.555	-1.11738	4.81654e-05	4.67302e-05	TLDC2
140738	0.945	0.18	-2.25828	1.70765e-08	1.30678e-08	TMEM37
142940	4.385	1.385	-1.66229	1.01289e-45	2.5724e-46	TRUB1
144347	9.325	3.085	-1.59476	3.33892e-57	6.91624e-58	FAM101A
1445	37.58	16.305	-1.19984	1.24796e-176	8.71989e-178	CSK
145781	0.535	0.245	-1.13797	3.25796e-06	2.88096e-06	GCOM1
146330	0.24	0.075	-1.61753	0.000807727	0.000878979	FBXL16
147011	0.59	0.225	-1.48776	0.000954108	0.00104816	PROCA1
147719	0.19	0.055	-1.72391	0.000748362	0.000810884	LYPD4
147912	11.73	5.345	-1.13339	2.28184e-66	4.15075e-67	SIX5
148113	0.4	0.15	-1.4159	2.12674e-05	2.00287e-05	CILP2
148252	3.45	0.995	-1.79262	2.71481e-40	7.67481e-41	DIRAS1
1488	45.255	22.185	-1.02592	1.0858e-193	7.0325e-195	CTBP2
149076	3.425	1.14	-1.46713	1.17e-28	4.35726e-29	ZNF362
149420	1	0.48	-1.03078	1.1057e-07	8.88235e-08	PDIK1L
153090	3.74	1.165	-1.67166	6.3141e-72	1.07948e-72	DAB2IP
153769	20.225	6.525	-1.61362	1.13718e-196	7.26575e-198	SH3RF2
157	3.915	1.3	-1.41858	1.00844e-62	1.95061e-63	GRK3
158135	1.34	0.7	-1.14446	1.34455e-07	1.08639e-07	TTLL11
158219	0.92	0.38	-1.27477	1.9594e-07	1.5989e-07	TTC39B
159371	3.585	1.695	-1.21286	4.97789e-20	2.38319e-20	SLC35G1
160851	1.99	0.885	-1.14777	2.2614e-59	4.54901e-60	DGKH
160897	3.22	1.335	-1.27356	9.85421e-59	1.99808e-59	GPR180
162461	15.3	5.565	-1.44148	2.22847e-61	4.39824e-62	TMEM92
163486	2.13	1.125	-1.03762	2.76217e-26	1.09193e-26	DENND1B
164091	11.255	4.58	-1.29844	4.21637e-66	7.70664e-67	PAQR7
164312	0.29	0.04	-2.74015	1.60111e-05	1.49407e-05	LRRN4
1677	3.91	1.625	-1.30686	1.21138e-25	4.87361e-26	DFFB
169792	0.225	0.095	-1.23319	0.000230159	0.000236999	GLIS3
170394	16.98	7.01	-1.35029	7.05244e-91	9.69094e-92	PWWP2B
171568	16.24	5.815	-1.40326	2.44171e-94	3.23411e-95	POLR3H
1741	9.075	4.315	-1.09536	9.76263e-70	1.7132e-70	DLG3
1748	1.11	0.45	-1.20766	2.77258e-05	2.63981e-05	DLX4
1757	0.115	0.01	-3.79262	0.000310827	0.00032351	SARDH
1788	13.13	6.25	-1.00287	3.6933e-65	6.87448e-66	DNMT3A
1789	22.83	10.83	-1.06943	2.42959e-144	2.09812e-145	DNMT3B
1808	5.275	2.15	-1.28661	3.14496e-49	7.46869e-50	DPYSL2
192683	2.41	1.145	-1.03971	4.18006e-13	2.56221e-13	SCAMP5
1943	8.395	3.125	-1.42014	1.96402e-43	5.22573e-44	EFNA2
1956	69.285	38.26	-1.55931	0	0	EGFR
196483	9.24	3.19	-1.5315	1.37575e-58	2.79554e-59	EEF2KMT
197259	9.875	4.45	-1.1505	2.13706e-47	5.26216e-48	MLKL
200879	16.66	7.77	-1.05616	1.26009e-83	1.87673e-84	LIPH
201292	10.67	4.8	-1.1395	2.52785e-62	4.93381e-63	TRIM65
201798	0.185	0.03	-2.72223	0.000199781	0.000204465	TIGD4
203197	3.305	1.635	-1.02293	4.62604e-22	2.07506e-22	C9orf91
205	8.78	3.495	-1.32741	5.34567e-130	5.22459e-131	AK4
2063	31.34	12.5	-1.32518	1.02679e-119	1.08142e-120	NR2F6
219	43.425	11.355	-1.9347	0	0	ALDH1B1
219738	6.815	3.505	-1.02708	3.19753e-12	2.03225e-12	C10orf35
219749	0.31	0.07	-2.15519	1.32688e-06	1.14334e-06	ZNF25
219771	21.33	8.935	-1.23712	1.12994e-153	9.11501e-155	CCNY
219833	0.77	0.22	-1.81378	7.31433e-11	4.95925e-11	C11orf45
220	0.37	0.09	-1.89215	8.53663e-06	7.79909e-06	ALDH1A3
221895	3.09	0.87	-1.81268	2.31026e-34	7.44445e-35	JAZF1
222643	28.625	12.305	-1.21705	6.32701e-167	4.707e-168	UNC5CL
222950	1.235	0.35	-1.89673	9.10831e-17	4.83499e-17	NYAP1
2246	0.55	0.265	-1.06327	0.000161436	0.000163855	FGF1
225689	1.425	0.685	-1.04321	1.85195e-06	1.61064e-06	MAPK15
22875	0.855	0.335	-1.36183	2.2821e-10	1.58559e-10	ENPP4
22898	4.31	2.22	-1.02688	4.34033e-29	1.59487e-29	DENND3
22924	4.635	2.165	-1.08177	1.12763e-15	6.22672e-16	MAPRE3
22976	7.305	3.275	-1.11516	3.3376e-46	8.40817e-47	PAXIP1
23031	4.16	1.76	-1.24767	2.23269e-50	5.18823e-51	MAST3
23046	3.58	0.905	-1.98293	2.81507e-128	2.79648e-129	KIF21B
23051	2.275	0.73	-1.41233	6.9921e-39	2.03788e-39	ZHX3
23052	11.47	4.545	-1.33398	1.24377e-116	1.35168e-117	ENDOD1
23054	15.285	7.01	-1.09492	1.35742e-166	1.0158e-167	NCOA6
2306	1.475	0.635	-1.20682	4.07899e-14	2.39315e-14	FOXD2
23076	21.52	10.2	-1.07595	3.03022e-168	2.24108e-169	RRP1B
23102	4.175	1.495	-1.48367	2.07032e-65	3.83847e-66	TBC1D2B
23149	4.025	1.705	-1.21954	4.48254e-24	1.90018e-24	FCHO1
2317	334.38	113.415	-1.55933	0	0	FLNB
23170	27.73	12.59	-1.13832	3.22895e-159	2.53407e-160	TTLL12
23179	1.34	0.68	-1.03837	3.31918e-11	2.21125e-11	RGL1
2318	0.11	0.035	-1.71328	0.000168947	0.000171701	FLNC
23220	13.56	2.885	-2.23255	0	0	DTX4
23221	3.99	1.685	-1.16592	5.73648e-38	1.70121e-38	RHOBTB2
23229	1.21	0.455	-1.44609	8.40593e-17	4.45969e-17	ARHGEF9
23254	2.67	0.905	-1.56734	1.04064e-30	3.66904e-31	KAZN
23255	17.075	6.96	-1.25792	4.11783e-215	2.37869e-216	MTCL1
23263	1.75	0.875	-1.01065	2.4926e-14	1.45114e-14	MCF2L
23272	10.6	4.53	-1.21258	3.79665e-113	4.25895e-114	FAM208A
23329	1.67	0.46	-1.84719	3.7626e-44	9.86305e-45	TBC1D30
23338	11.43	2.975	-1.93154	4.79483e-278	2.20323e-279	JADE2
23367	52.74	22.74	-1.21389	0	0	LARP1
23396	18.32	7.56	-1.29909	1.72037e-184	1.16192e-185	PIP5K1C
23432	12.555	5.17	-1.2746	1.66619e-202	1.03784e-203	GPR161
23452	0.7	0.2	-1.88969	1.54723e-15	8.58335e-16	ANGPTL2
23463	26.05	8.775	-1.56701	0	0	ICMT
23492	0.425	0.21	-1.10456	0.000382249	0.000400929	CBX7
23508	1.525	0.695	-1.12474	1.65029e-14	9.52582e-15	TTC9
23545	2.78	1.195	-1.21623	2.37511e-35	7.50442e-36	ATP6V0A2
23551	0.115	0	-4.57023	0.000431025	0.000455214	RASD2
23617	0.615	0.085	-2.86642	5.77237e-08	4.56129e-08	TSSK2
23650	4.725	2.365	-1.04157	6.9951e-18	3.57547e-18	TRIM29
23769	0.81	0.24	-1.7325	1.63654e-09	1.18576e-09	FLRT1
24149	2.105	1.07	-1.02287	1.12673e-23	4.83546e-24	ZNF318
2524	14.625	5.585	-1.38802	7.03063e-104	8.5636e-105	FUT2
2535	2.62	1.045	-1.32671	8.50551e-23	3.74079e-23	FZD2
253558	5.895	2.835	-1.05565	2.34593e-44	6.12211e-45	LCLAT1
254263	0.51	0.08	-2.62912	4.74708e-05	4.60216e-05	CNIH2
257177	2.22	1.105	-1.00835	0.00092821	0.00101808	CFAP126
257364	8.635	3.825	-1.19279	1.1392e-51	2.59073e-52	SNX33
257407	3.44	1.34	-1.36378	7.97478e-29	2.95596e-29	C2orf72
25833	3.76	1.125	-1.71707	3.16542e-32	1.0768e-32	POU2F3
25900	0.555	0.135	-2.08073	1.33937e-06	1.15488e-06	IFFO1
259173	19.475	8.98	-1.08692	6.13193e-97	8.01458e-98	ALS2CL
25929	12.285	5.27	-1.22008	3.16977e-125	3.20433e-126	GEMIN5
25959	9.605	4.555	-1.07795	4.53045e-76	7.36871e-77	KANK2
25966	6.205	2.37	-1.45885	1.07536e-95	1.41807e-96	C2CD2
25987	23.325	8.65	-1.30276	1.14939e-133	1.08144e-134	TSKU
26049	4.97	2.32	-1.09813	1.47275e-48	3.55121e-49	FAM169A
26053	5.075	2.325	-1.12126	1.09419e-43	2.89377e-44	AUTS2
26064	9.96	4.49	-1.14829	3.55904e-85	5.22284e-86	RAI14
26119	15.445	5.515	-1.47149	3.71346e-123	3.80811e-124	LDLRAP1
26225	11.46	5.24	-1.12515	1.48555e-60	2.94281e-61	ARL5A
26235	2.135	0.66	-1.45097	2.90069e-21	1.33329e-21	FBXL4
2626	34.145	14.28	-1.22542	1.76071e-213	1.02479e-214	GATA4
26268	16.655	7.9	-1.04416	1.19799e-60	2.37142e-61	FBXO9
26579	60.57	25.335	-1.24474	2.56104e-280	1.16933e-281	MYEOV
268	0.52	0.185	-1.46331	0.000495544	0.000526391	AMH
271	12.915	6.175	-1.06486	7.79029e-75	1.28526e-75	AMPD2
2736	1.25	0.295	-2.04166	1.49535e-32	5.03666e-33	GLI2
2769	0.98	0.19	-2.3603	4.49616e-12	2.87664e-12	GNA15
2781	0.48	0.21	-1.20458	3.24191e-09	2.37778e-09	GNAZ
283349	12.955	6.465	-1.01434	8.00843e-64	1.51868e-64	RASSF3
283578	4.115	1.67	-1.04712	4.46503e-38	1.31959e-38	TMED8
284338	3	0.83	-1.85904	3.38616e-17	1.77328e-17	PRR19
285590	8.47	2.765	-1.61464	7.39556e-190	4.88703e-191	SH3PXD2B
285971	0.975	0.485	-1.00319	0.000202718	0.000207559	ZNF775
2863	4.9	2.205	-1.1526	7.54596e-25	3.11733e-25	GPR39
286410	4.345	2.135	-1.05639	1.21519e-40	3.40878e-41	ATP11C
28951	3.335	1.305	-1.35317	1.18686e-33	3.87293e-34	TRIB2
28955	13.19	5.31	-1.32524	4.37512e-43	1.17112e-43	DEXI
29	24.58	10.345	-1.21694	3.40099e-234	1.82569e-235	ABR
29057	3.91	1.58	-1.45702	3.4037e-26	1.34951e-26	FAM156A
291	0.13	0.025	-2.18884	0.000768088	0.000833491	SLC25A4
29123	25.075	12.42	-1.00927	0	0	ANKRD11
2919	2.9	1.39	-1.05778	1.94733e-06	1.69529e-06	CXCL1
29767	0.845	0.315	-1.42789	4.65003e-20	2.22352e-20	TMOD2
29887	2.235	1.055	-1.09062	1.71259e-10	1.18265e-10	SNX10
29901	8.14	3.72	-1.12771	2.29647e-22	1.0224e-22	SAC3D1
29903	1.245	0.545	-1.17289	2.38953e-05	2.26116e-05	CCDC106
29904	4.51	1.6	-1.49251	3.07166e-86	4.44488e-87	EEF2K
29933	2.72	0.615	-1.93033	1.55038e-33	5.07954e-34	GPR132
29940	0.145	0.04	-1.94455	0.000792392	0.000860442	DSE
30815	6.19	2.925	-1.09793	1.95993e-25	7.95377e-26	ST6GALNAC6
30819	0.58	0.18	-1.64238	0.000109571	0.000109807	KCNIP2
30850	36.175	17.405	-1.05773	6.92753e-191	4.55754e-192	CDR2L
3096	4.28	1.955	-1.12359	5.77354e-64	1.09234e-64	HIVEP1
3110	2.97	1.235	-1.26936	1.24086e-12	7.75077e-13	MNX1
3141	8.615	4.185	-1.07547	3.75041e-72	6.38993e-73	HLCS
3223	1.15	0.18	-2.69576	3.75692e-12	2.39491e-12	HOXC6
3229	0.595	0.08	-2.90583	5.75874e-10	4.08682e-10	HOXC13
3305	0.335	0.1	-1.76235	0.00034325	0.000358759	HSPA1L
3312	1283.52	335.13	-1.93795	0	0	HSPA8
3321	10.94	4.525	-1.26562	7.87854e-156	6.275e-157	IGSF3
333929	1.59	0.665	-1.25707	1.02315e-06	8.74901e-07	SNAI3
3340	14.495	5.66	-1.35719	1.00529e-238	5.30853e-240	NDST1
338382	5.43	2.475	-1.10884	9.45872e-25	3.91442e-25	RAB7B
338692	12.245	5.36	-1.20195	4.1481e-47	1.02624e-47	ANKRD13D
339559	2.015	0.86	-1.19117	2.24562e-11	1.48195e-11	ZFP69
3397	383.145	174.115	-1.14364	0	0	ID1
340024	0.305	0.145	-1.11302	0.000532919	0.000568036	SLC6A19
342979	4.115	1.98	-1.02782	1.08256e-14	6.22823e-15	PALM3
3455	6.465	3.08	-1.33783	1.05322e-35	3.28783e-36	IFNAR2
345643	2.425	0.945	-1.38678	2.07975e-12	1.31181e-12	MCIDAS
353116	4.315	1.95	-1.10602	4.73392e-15	2.67244e-15	RILPL1
3549	5.56	0.655	-3.08823	9.0767e-73	1.53325e-73	IHH
357	0.255	0.075	-1.62572	1.36624e-05	1.26793e-05	SHROOM2
3660	6.295	0.925	-2.76833	4.70375e-82	7.15656e-83	IRF2
3663	3.315	1.29	-1.35966	1.97215e-22	8.76285e-23	IRF5
3694	14.26	5.21	-1.46214	2.96891e-165	2.25204e-166	ITGB6
3696	0.615	0.25	-1.31172	7.09312e-13	4.39539e-13	ITGB8
3707	4.08	1.565	-1.52026	2.13767e-63	4.0912e-64	ITPKB
374918	26.275	5.18	-2.34181	6.59161e-92	8.96154e-93	IGFL1
375033	1.86	0.67	-1.5486	1.5222e-25	6.14627e-26	PEAR1
3797	5.12	2.395	-1.09185	7.87822e-45	2.04102e-45	KIF3C
3853	44.765	1.635	-4.77543	0	0	KRT6A
3854	2.47	0.335	-2.8949	5.58927e-35	1.77904e-35	KRT6B
3860	17.42	4.335	-2.00309	2.19582e-114	2.44398e-115	KRT13
3861	1.715	0.345	-2.32397	2.2345e-14	1.29795e-14	KRT14
3868	3.565	0.305	-3.5447	5.96103e-44	1.56955e-44	KRT16
3872	91.695	36.25	-1.33761	0	0	KRT17
388115	9.625	1.535	-2.64833	4.53689e-277	2.09132e-278	C15orf52
388372	2.995	0.03	-6.65189	6.05796e-22	2.7368e-22	CCL4L1
3885	0.35	0.045	-2.85382	6.91401e-05	6.81288e-05	KRT34
388630	3.24	1.005	-1.95395	1.24041e-48	2.98735e-49	TRABD2B
388650	6.08	3.53	-1.18625	4.64427e-23	2.0243e-23	FAM69A
388677	0.37	0.17	-1.13146	0.000103071	0.000103037	NOTCH2NL
388697	1.265	0.5	-1.33784	7.36485e-28	2.80079e-28	HRNR
388698	0.15	0.055	-1.56049	4.95243e-05	4.81209e-05	FLG2
3887	3.385	0.855	-1.98545	6.63884e-26	2.66027e-26	KRT81
388886	3.04	1.42	-1.10456	6.59666e-07	5.56965e-07	LRRC75B
3897	62.12	26.37	-1.23565	0	0	L1CAM
3902	0.34	0.045	-2.92386	3.77087e-05	3.62275e-05	LAG3
3909	194.165	63.335	-1.60325	0	0	LAMA3
3932	1.77	0.84	-1.07273	4.55378e-07	3.80496e-07	LCK
3984	19.94	8.82	-1.16214	2.58239e-113	2.89307e-114	LIMK1
401546	3.35	0.97	-1.78614	5.963e-31	2.0911e-31	C9orf152
402415	0.555	0.26	-1.0757	0.000161771	0.000164242	XKRX
404550	7.18	2.74	-1.38781	1.08055e-15	5.95974e-16	C16orf74
4086	4.595	1.99	-1.20568	1.19492e-25	4.80565e-26	SMAD1
4091	6.04	1.145	-2.43328	5.02974e-126	5.04788e-127	SMAD6
412	4.305	1.595	-1.42169	4.19286e-68	7.4863e-69	STS
4131	0.185	0.07	-1.4003	1.7907e-06	1.55658e-06	MAP1B
4134	77.64	37.555	-1.04742	0	0	MAP4
4144	128.085	61.865	-1.04891	0	0	MAT2A
4162	0.17	0.025	-2.75943	0.000196124	0.000200465	MCAM
4301	24.575	9.9	-1.31775	0	0	MLLT4
4363	21.64	10.335	-1.16308	4.57435e-231	2.48226e-232	ABCC1
440193	8.29	3.69	-1.16626	5.20885e-86	7.56032e-87	CCDC88C
445329	26.63	11.27	-1.24002	3.31784e-71	5.71585e-72	SULT1A4
463	4.21	1.99	-1.07166	1.13396e-90	1.55985e-91	ZFHX3
4703	0.025	0.005	-2.1869	0.000424588	0.000447983	NEB
4781	0.205	0.085	-1.2956	6.86604e-05	6.76361e-05	NFIB
4782	20.43	9.325	-1.05106	3.78439e-138	3.44474e-139	NFIC
4814	21.685	10.665	-1.02408	3.19586e-40	9.04408e-41	NINJ1
493	38.205	13.18	-1.53354	0	0	ATP2B4
493869	4.51	1.805	-1.3252	8.65135e-38	2.577e-38	GPX8
4973	60.175	27.275	-1.14022	2.79534e-253	1.39456e-254	OLR1
5001	9.995	4.625	-1.10442	1.78626e-32	6.02952e-33	ORC5
5013	2.67	1.13	-1.23705	5.12665e-16	2.79692e-16	OTX1
50509	0.46	0.16	-1.58518	8.85329e-09	6.66133e-09	COL5A3
50855	2.005	0.97	-1.03363	5.7045e-05	5.57862e-05	PARD6A
5097	52.705	20.205	-1.37899	0	0	PCDH1
51078	28.6	13.34	-1.02838	5.17013e-77	8.27339e-78	THAP4
51127	0.375	0.085	-1.81123	5.47426e-05	5.34068e-05	TRIM17
51161	0.84	0.3	-1.59076	4.91282e-07	4.1107e-07	C3orf18
51199	5.93	2.38	-1.59576	3.06212e-105	3.68958e-106	NIN
51301	3.275	0.95	-1.78393	2.93256e-38	8.64118e-39	GCNT4
5141	3.78	1.28	-1.58397	5.5861e-49	1.3323e-49	PDE4A
5144	0.225	0.105	-1.05135	0.000430166	0.00045412	PDE4D
51449	15.32	7.615	-1.00822	2.44704e-114	2.73072e-115	PCYOX1
51523	18.775	7.23	-1.3809	2.35549e-104	2.85878e-105	CXXC5
5154	36.985	14.41	-1.35338	5.7537e-205	3.47474e-206	PDGFA
5155	44.4	7.72	-2.57739	0	0	PDGFB
51564	46.38	23.085	-1.02088	1.74442e-270	8.19374e-272	HDAC7
51585	9.51	4.395	-1.11343	7.272e-93	9.74866e-94	PCF11
51611	5.18	2.425	-1.12965	1.59712e-16	8.54094e-17	DPH5
51678	0.295	0.09	-1.73852	5.38448e-09	4.00344e-09	MPP6
5266	8.035	3.455	-1.21659	1.21047e-09	8.71929e-10	PI3
5287	10.44	2.055	-2.35588	0	0	PIK3C2B
5291	16.705	7.52	-1.16662	4.50329e-140	4.02028e-141	PIK3CB
5296	17.575	7.99	-1.13599	1.35013e-117	1.44757e-118	PIK3R2
5327	11.27	0.725	-3.97016	7.15271e-276	3.30754e-277	PLAT
53335	1.29	0.275	-2.23124	1.58748e-23	6.83827e-24	BCL11A
53342	2.58	1.18	-1.1254	1.15194e-10	7.8776e-11	IL17D
53354	4.03	1.015	-1.58247	2.69107e-38	7.92174e-39	PANK1
540	1.63	0.83	-1.0229	7.42152e-15	4.24055e-15	ATP7B
54020	11.75	3.715	-1.65893	2.22131e-106	2.66028e-107	SLC37A1
5413	0.445	0.16	-1.48776	0.000954108	0.00104816	SEPT5
54436	3.515	0.84	-2.02035	3.01783e-58	6.15869e-59	SH3TC1
54453	10.535	1.97	-2.40673	1.05131e-206	6.27231e-208	RIN2
54467	7.455	3.19	-1.24658	3.91512e-89	5.49409e-90	ANKIB1
545	2.675	1.325	-1.0124	1.37841e-31	4.7594e-32	ATR
5460	9.29	4.325	-1.04362	7.04521e-25	2.90533e-25	POU5F1
54620	24.75	10.525	-1.22852	1.32702e-174	9.40784e-176	FBXL19
54626	13.185	6.395	-1.04325	5.83453e-83	8.77485e-84	HES2
5465	1	0.51	-1.066	4.69902e-13	2.88648e-13	PPARA
54682	2.995	1.445	-1.04868	1.63462e-11	1.07325e-11	MANSC1
54749	16.08	7.885	-1.01138	1.27436e-57	2.62298e-58	EPDR1
54756	2.695	1.16	-1.20479	3.9303e-44	1.03141e-44	IL17RD
54841	2.43	0.99	-1.15968	8.85489e-16	4.86451e-16	BIVM
54842	8.285	3.255	-1.34501	1.23523e-85	1.80547e-86	MFSD6
54843	43.465	21.475	-1.0373	5.34258e-297	2.34581e-298	SYTL2
54880	14.875	5.625	-1.38577	2.45918e-220	1.38828e-221	BCOR
54894	34.355	10.3	-1.76153	0	0	RNF43
54979	0.65	0.215	-1.9328	0.00042104	0.000443932	HRASLS2
55016	0.42	0.21	-1.05565	8.23219e-05	8.17182e-05	2018-03-01
55027	9.205	3.665	-1.27377	4.92116e-61	9.72708e-62	HEATR3
55028	5.78	2.815	-1.10936	2.32838e-33	7.66587e-34	C17orf80
55040	1.575	0.475	-1.73069	6.29513e-21	2.92108e-21	EPN3
55070	0.8	0.365	-1.11853	0.000198807	0.00020341	DET1
5509	0.59	0.12	-2.26326	1.0549e-10	7.19399e-11	PPP1R3D
55107	22.225	9.66	-1.21145	2.52258e-186	1.68533e-187	ANO1
55109	5.195	1.89	-1.45642	7.92922e-59	1.60429e-59	AGGF1
55144	7.725	2.07	-1.89253	8.10504e-93	1.08772e-93	LRRC8D
55160	4.515	1.185	-1.94327	2.26337e-72	3.84972e-73	ARHGEF10L
55222	2.22	0.78	-1.54714	1.68649e-19	8.22423e-20	LRRC20
55237	0.225	0.02	-3.36497	8.7954e-07	7.49151e-07	VRTN
55315	9.565	3.305	-1.53275	1.51203e-58	3.07467e-59	SLC29A3
55343	28.29	12.115	-1.19653	6.08831e-150	5.04453e-151	SLC35C1
55349	4.72	1.645	-1.1627	2.84981e-38	8.39321e-39	CHDH
5540	0.285	0.05	-2.15913	3.43824e-08	2.68027e-08	NPY4R
55604	9.36	4	-1.22648	4.62518e-97	6.02498e-98	LRRC16A
55612	24.65	6.515	-1.91896	0	0	FERMT1
55640	1.505	0.53	-1.47214	6.40158e-15	3.64189e-15	FLVCR2
55657	14.88	5.055	-1.5636	1.61583e-81	2.46785e-82	ZNF692
55672	4.875	2.355	-1.04733	1.71557e-45	4.38449e-46	NBPF1
55689	8.205	3.26	-1.341	2.41494e-114	2.69138e-115	YEATS2
55703	3.955	1.88	-1.10266	1.89925e-28	7.11188e-29	POLR3B
55734	13.135	3.845	-1.78116	7.81828e-131	7.57277e-132	ZFP64
55775	4.115	1.775	-1.18428	7.96551e-29	2.95136e-29	TDP1
5578	6.905	3.78	-1.0341	7.90121e-74	1.31624e-74	PRKCA
55784	1.16	0.455	-1.20568	2.60332e-10	1.81409e-10	MCTP2
55806	7.425	2.6	-1.50895	3.52195e-106	4.22309e-107	HR
55830	8.035	3.885	-1.04638	1.17643e-24	4.88057e-25	GLT8D1
55858	54.785	17.86	-1.61889	0	0	TMEM165
56122	0.67	0.305	-1.14536	6.02798e-06	5.44915e-06	PCDHB14
56123	1.92	0.86	-1.15383	6.18381e-13	3.82289e-13	PCDHB13
5681	6.235	2.715	-1.19824	6.30718e-41	1.75913e-41	PSKH1
56890	1.555	0.605	-1.19939	4.69876e-10	3.31813e-10	MDM1
56894	16.675	7.685	-1.11268	1.56002e-165	1.17879e-166	AGPAT3
56938	11	3.715	-1.55819	1.0576e-203	6.47954e-205	ARNTL2
57053	1.08	0.275	-2.24214	2.14196e-15	1.19514e-15	CHRNA10
57121	2.8	0.405	-2.77237	1.40185e-44	3.64609e-45	LPAR5
57168	1.33	0.45	-1.56064	2.08311e-13	1.26349e-13	ASPHD2
57181	4.74	1.885	-1.23733	3.38935e-51	7.76725e-52	SLC39A10
57209	2.97	1.235	-1.29342	8.74919e-24	3.74331e-24	ZNF248
57216	0.975	0.41	-1.23902	3.95788e-11	2.6483e-11	VANGL2
57224	2.29	0.805	-1.37661	2.70568e-39	7.81084e-40	NHSL1
5727	0.52	0.17	-1.61947	4.70084e-13	2.88828e-13	PTCH1
57325	2.62	0.575	-2.18776	4.20724e-43	1.12557e-43	KAT14
5738	12.825	5.425	-1.23102	2.70417e-150	2.23662e-151	PTGFRN
57406	6.665	3.195	-1.05097	1.01845e-24	4.21774e-25	ABHD6
57465	5.61	2.315	-1.30008	6.59368e-76	1.0763e-76	TBC1D24
5747	29.085	12.66	-1.19984	7.60789e-232	4.10621e-233	PTK2
57478	6.23	2.635	-1.07743	5.08049e-73	8.53755e-74	USP31
57479	28.5	12.005	-1.22841	0	0	PRR12
57480	2.24	0.835	-1.41156	1.68175e-39	4.82531e-40	PLEKHG1
57514	0.405	0.185	-1.0217	3.0422e-05	2.90362e-05	ARHGAP31
57523	0.34	0.155	-1.07837	1.9462e-05	1.82717e-05	NYNRIN
57533	19.31	7.245	-1.34878	2.78571e-182	1.91396e-183	TBC1D14
57558	4.06	1.9	-1.05249	5.53686e-23	2.42304e-23	USP35
576	0.475	0.22	-1.04112	0.000156418	0.000158625	ADGRB2
57605	2.405	1.105	-1.13753	5.09056e-29	1.87501e-29	PITPNM2
57613	2.465	1.21	-1.0382	6.6352e-18	3.38861e-18	FAM234B
57619	14.74	5.995	-1.28718	2.821e-248	1.46497e-249	SHROOM3
57622	1.935	0.285	-2.78654	8.97247e-38	2.67397e-38	LRFN1
57670	4.2	1.625	-1.36891	2.66913e-118	2.85007e-119	KIAA1549
57673	3.68	1.095	-1.74145	7.69338e-73	1.29845e-73	BEND3
57677	1.055	0.505	-1.0442	5.6739e-13	3.50105e-13	ZFP14
57715	6.08	2.99	-1.02694	1.68175e-39	4.82549e-40	SEMA4G
57722	0.05	0	-4.57023	0.000431025	0.000455214	IGDCC4
57732	2.01	0.795	-1.57023	2.07196e-22	9.21541e-23	ZFYVE28
5774	9.245	3.685	-1.3088	3.24396e-132	3.09478e-133	PTPN3
5775	1.165	0.59	-1.00099	7.44186e-18	3.806e-18	PTPN4
5780	12.6	6.135	-1.03639	7.41206e-73	1.24881e-73	PTPN9
57822	3.8	1.795	-1.06042	2.11699e-17	1.09937e-17	GRHL3
5791	2.72	1.075	-1.55591	8.01733e-31	2.82204e-31	PTPRE
58480	17.53	5.575	-1.65086	3.28984e-227	1.80442e-228	RHOU
58495	11.365	4.185	-1.33863	1.11037e-36	3.39333e-37	OVOL2
58497	6.695	2.705	-1.28054	6.19414e-41	1.7267e-41	PRUNE
5884	6.895	2.92	-1.19004	1.05397e-35	3.29169e-36	RAD17
5892	6.97	3.28	-1.05343	7.5562e-25	3.12266e-25	RAD51D
59271	12.745	6.24	-1.06061	5.89431e-38	1.74888e-38	EVA1C
59339	5.14	2.19	-1.23695	1.26837e-55	2.68835e-56	PLEKHA2
5994	0.955	0.34	-1.48534	3.00337e-08	2.32987e-08	RFXAP
5998	2.785	0.905	-1.24691	3.341e-23	1.45088e-23	RGS3
602	106.92	39.745	-1.41811	0	0	BCL3
60312	15.24	6.955	-1.1517	7.24832e-192	4.72629e-193	AFAP1
6041	2.605	1.175	-1.14552	3.35069e-20	1.59146e-20	RNASEL
60436	11.635	5.16	-1.16578	2.04582e-69	3.60205e-70	TGIF2
60526	2.87	1.31	-1.15346	7.96913e-21	3.71297e-21	LDAH
610	0.195	0.035	-2.62912	4.74708e-05	4.60216e-05	HCN2
613	18.545	8.49	-1.12616	1.20867e-212	7.07016e-214	BCR
623	0.485	0.045	-3.45919	9.21996e-06	8.44356e-06	BDKRB1
6239	12.69	6.185	-1.02761	1.99423e-156	1.57961e-157	RREB1
624	2.625	0.285	-3.22433	5.73273e-73	9.64197e-74	BDKRB2
6310	24.395	8.025	-1.60249	0	0	ATXN1
632	0.58	0.08	-2.8806	0.00069378	0.000748807	BGLAP
6382	25.915	5.94	-2.11288	0	0	SDC1
63898	13.96	4.41	-1.67342	9.1827e-137	8.4657e-138	SH2D4A
63939	4.25	1.035	-2.08986	2.62281e-88	3.7265e-89	FAM217B
63971	6.14	2.965	-1.31065	8.77333e-70	1.53831e-70	KIF13A
63977	3.565	1.415	-1.31461	3.04172e-51	6.96617e-52	PRDM15
64207	9.41	2.74	-1.77878	1.36381e-130	1.32297e-131	IRF2BPL
643008	1.2	0.63	-1.13408	0.00036869	0.000386424	SMIM5
64324	9.085	3.435	-1.36198	1.93308e-252	9.67207e-254	NSD1
64582	0.56	0.18	-1.68431	1.82216e-14	1.05418e-14	GPR135
647219	4.92	1.535	-1.68285	3.19646e-22	1.42634e-22	ASCL5
64759	9.325	4.055	-1.1921	3.03411e-127	3.02292e-128	TNS3
64766	5.46	2.745	-1.14695	8.14823e-40	2.32016e-40	S100PBP
6480	2.4	0.465	-2.3544	1.2126e-50	2.80187e-51	ST6GAL1
6483	5.885	2.785	-1.07968	1.49437e-41	4.10689e-42	ST3GAL2
64855	125.45	58.96	-1.08745	0	0	FAM129B
64900	13.42	6.155	-1.13007	4.46963e-90	6.194e-91	LPIN3
64921	2.275	1.13	-1.01461	3.91706e-13	2.39985e-13	CASD1
6502	9.62	4.35	-1.13244	2.80059e-52	6.30363e-53	SKP2
6509	3.845	1.775	-1.09888	3.76397e-29	1.37869e-29	SLC1A4
6513	159.44	63.745	-1.32144	0	0	SLC2A1
65243	0.86	0.39	-1.07714	8.56756e-07	7.28745e-07	ZFP69B
652968	1.925	0.91	-1.07587	3.22891e-06	2.85386e-06	GATSL3
653145	0.885	0.42	-1.12085	0.000323912	0.000337885	ANXA8
6533	5.665	2.47	-1.22433	5.06699e-53	1.12645e-53	SLC6A6
653333	3.44	1.835	-1.02461	2.46817e-07	2.03278e-07	FAM86B2
653513	0.395	0.205	-1.22926	0.00047227	0.00050098	LOC653513
6536	3.29	1.53	-1.09404	1.06342e-16	5.64965e-17	SLC6A9
653659	4.05	1.095	-1.88705	1.33432e-25	5.37211e-26	TMEM183B
6542	1.84	0.515	-1.81195	1.44739e-47	3.55552e-48	SLC7A2
657	9.31	3.025	-1.52138	3.2796e-101	4.12864e-102	BMPR1A
6573	15.185	6.155	-1.32032	2.24521e-97	2.91161e-98	SLC19A1
6575	68.31	29.73	-1.2237	0	0	SLC20A2
6578	7.6	3.795	-1.02374	7.06053e-45	1.82506e-45	SLCO2A1
6584	7.54	2.5	-1.50755	9.70938e-59	1.96729e-59	SLC22A5
65999	10.58	4.77	-1.14229	1.42158e-36	4.35064e-37	LRRC61
6654	4.745	2.32	-1.01785	2.26001e-45	5.78909e-46	SOS1
6666	10.845	4.69	-1.20946	3.17382e-94	4.20844e-95	SOX12
6725	0.5	0.175	-1.5378	0.000132238	0.000133275	SRMS
6751	1.185	0.335	-1.8272	5.92921e-19	2.92946e-19	SSTR1
6777	13.145	5.905	-1.15718	6.35981e-116	6.94866e-117	STAT5B
6907	7.875	2.13	-1.88525	2.60583e-152	2.11728e-153	TBL1X
6910	0.415	0.135	-1.59407	4.34665e-06	3.88298e-06	TBX5
692094	1.985	0.41	-2.27391	2.22672e-07	1.82548e-07	MSMP
6925	0.535	0.19	-1.47199	3.42508e-10	2.40071e-10	TCF4
6928	7.97	2.115	-1.95655	1.44579e-81	2.20393e-82	HNF1B
7023	12.195	2.91	-2.04514	5.3241e-102	6.617e-103	TFAP4
7031	8.62	3.975	-1.11514	4.27475e-08	3.35045e-08	TFF1
7049	1.875	0.785	-1.28592	1.13877e-23	4.88878e-24	TGFBR3
7051	1.61	0.35	-2.21353	7.75157e-21	3.60934e-21	TGM1
7145	3.535	0.675	-2.38449	9.20228e-171	6.6984e-172	TNS1
7168	136.545	56.895	-1.27974	0	0	TPM1
7187	14.445	6.35	-1.16343	6.85941e-173	4.92297e-174	TRAF3
7188	5.53	2.565	-1.11247	2.2929e-37	6.9102e-38	TRAF5
72	2.725	1.13	-1.27971	1.44526e-08	1.10008e-08	ACTG2
7204	24.26	10.36	-1.20152	0	0	TRIO
728485	2.87	1.025	-1.482	6.18414e-15	3.51278e-15	LOC728485
728888	1.525	0.66	-1.21036	2.76294e-11	1.83463e-11	NPIPB11
729092	1.255	0.545	-1.19819	6.01207e-07	5.05766e-07	AGAP5
7327	33.945	16.435	-1.03873	2.22222e-145	1.88662e-146	UBE2G2
7343	31.89	9.825	-1.73114	0	0	UBTF
7352	0.46	0.185	-1.34282	0.000796467	0.000865797	UCP3
7410	19.15	7.32	-1.38397	1.69083e-206	1.01125e-207	VAV2
7429	181.01	72.785	-1.31323	0	0	VIL1
7447	2.375	0.83	-1.52281	7.16552e-14	4.26046e-14	VSNL1
747	1.885	0.74	-1.3918	5.69653e-26	2.27437e-26	DAGLA
7580	0.905	0.335	-1.53985	7.81334e-05	7.74122e-05	ZNF32
7638	1.03	0.49	-1.03581	2.19151e-06	1.91394e-06	ZNF221
7703	17.97	7.42	-1.25071	2.06879e-96	2.71603e-97	PCGF2
7804	8.66	3.665	-1.45439	8.77118e-103	1.08244e-103	LRP8
782	9.385	4.275	-1.16147	5.00161e-52	1.13015e-52	CACNB1
79047	25.485	6.775	-1.89522	0	0	KCTD15
79072	5.625	2.515	-1.16485	2.29212e-24	9.60612e-25	FASTKD3
79170	1.68	0.11	-3.9081	4.31117e-20	2.05834e-20	PRR15L
79413	0.16	0.01	-3.6857	0.000564381	0.000603135	ZBED2
79447	23.34	11.515	-1.01847	4.56992e-126	4.57974e-127	PAGR1
7957	0.745	0.28	-1.42338	7.36278e-07	6.24013e-07	EPM2A
79628	0.295	0.065	-2.24603	2.15361e-36	6.6255e-37	SH3TC2
79640	2.64	1.105	-1.253	3.76219e-27	1.45652e-27	C22orf46
79668	1.32	0.55	-1.03829	5.12168e-10	3.61978e-10	PARP8
79683	3.44	1.22	-1.47735	4.79107e-27	1.85765e-27	ZDHHC14
79705	3.435	1.02	-1.6598	1.83799e-73	3.07525e-74	LRRK1
79714	15.42	6.68	-1.17436	6.77913e-43	1.82154e-43	CCDC51
79746	3.8	1.76	-1.10909	1.59442e-11	1.04592e-11	ECHDC3
79754	1.43	0.665	-1.09921	1.34455e-07	1.08632e-07	ASB13
79810	2.98	1.475	-1.09966	4.82053e-11	3.23887e-11	PTCD2
79833	9.985	4.715	-1.08148	7.86156e-12	5.07914e-12	GEMIN6
79873	1.615	0.73	-1.13907	1.72548e-05	1.61441e-05	NUDT18
79891	0.305	0.09	-1.85988	0.000150826	0.000152778	ZNF671
79899	0.315	0.08	-1.94874	2.31669e-05	2.19021e-05	PRR5L
79961	3.385	1.37	-1.36378	2.42786e-16	1.30649e-16	DENND2D
79990	5.05	2.35	-1.09395	1.77529e-25	7.19928e-26	PLEKHH3
800	136.47	61.265	-1.15728	0	0	CALD1
80028	19.48	6.875	-1.81305	0	0	FBXL18
80045	6.305	2.225	-1.56272	4.11158e-32	1.40346e-32	GPR157
8019	11.515	6.015	-1.02461	6.96297e-88	9.93364e-89	BRD3
8021	10.545	5.47	-1.03818	8.72853e-112	9.90595e-113	NUP214
80312	0.155	0.065	-1.25068	1.35056e-05	1.25299e-05	TET1
80746	3.85	1.63	-1.29415	1.12817e-17	5.79612e-18	TSEN2
80854	14.83	7.53	-1.03278	2.46442e-143	2.14977e-144	SETD7
80864	3.205	1.215	-1.39672	5.97341e-11	4.03091e-11	EGFL8
81027	0.46	0.085	-2.43272	2.07324e-09	1.50761e-09	TUBB1
81029	5.7	2.19	-1.37204	4.46187e-29	1.64084e-29	WNT5B
81031	0.645	0.245	-1.45161	2.99939e-08	2.32591e-08	SLC2A10
81493	0.64	0.29	-1.12826	5.09668e-05	4.95671e-05	SYNC
81543	3.815	1.835	-1.05112	1.24407e-15	6.88886e-16	LRRC3
81606	1.805	0.52	-1.79262	4.87462e-19	2.40202e-19	LBH
81615	1.165	0.41	-1.51776	3.41997e-07	2.84163e-07	TMEM163
8165	25.865	12.43	-1.04893	2.6814e-148	2.24517e-149	AKAP1
81786	2.2	1.265	-1.15949	2.02048e-10	1.40087e-10	TRIM7
81839	9.51	2.5	-1.92701	2.89709e-303	1.24669e-304	VANGL1
8200	0.115	0	-4.41822	0.000880848	0.000963048	GDF5
8266	29.215	11.795	-1.30719	1.71589e-145	1.45425e-146	UBL4A
8313	107.74	44.305	-1.27284	0	0	AXIN2
83448	2.615	1.085	-1.19738	8.35859e-20	4.03464e-20	PUS7L
83605	24.45	11.39	-1.10501	7.75987e-70	1.35722e-70	CCM2
83693	4.79	2.24	-1.09653	4.89287e-29	1.80148e-29	HSDL1
83742	17.665	5.035	-1.81086	9.6889e-193	6.30354e-194	MARVELD1
83849	0.175	0.05	-1.77545	0.000812618	0.000884421	SYT15
83935	1.04	0.285	-1.86798	3.52726e-08	2.75275e-08	TMEM133
8396	13.385	6.195	-1.12762	4.32875e-119	4.59063e-120	PIP4K2B
84062	12.105	4.925	-1.21011	7.18984e-31	2.52762e-31	DTNBP1
84078	1.245	0.525	-1.24339	1.22764e-08	9.30323e-09	KBTBD7
84133	5.35	2.44	-1.10325	2.12617e-57	4.38553e-58	ZNRF3
84166	14.995	6.84	-1.14187	2.12345e-131	2.04747e-132	NLRC5
84187	5.435	2.555	-1.029	2.98806e-40	8.45167e-41	TMEM164
84253	0.83	0.395	-1.08208	3.60676e-06	3.20202e-06	GARNL3
84254	4.515	1.025	-2.29594	2.03579e-64	3.82494e-65	CAMKK1
84281	0.26	0.09	-1.53275	0.000379095	0.000397495	C2orf88
84282	2.825	1.23	-1.12443	3.6922e-12	2.35312e-12	RNF135
84302	6.995	3	-1.22119	1.84246e-57	3.79765e-58	TMEM246
84327	1.655	0.755	-1.12613	2.7975e-05	2.66436e-05	ZBED3
84342	6.205	2.93	-1.07955	2.71481e-25	1.10806e-25	COG8
8440	24.53	11.005	-1.14956	2.37016e-104	2.88004e-105	NCK2
84448	0.71	0.225	-1.70147	3.21964e-07	2.67189e-07	ABLIM2
84450	4.095	1.94	-1.09629	1.69231e-24	7.06522e-25	ZNF512
8447	2.09	0.88	-1.22445	8.31602e-09	6.24617e-09	DOC2B
84532	1.045	0.37	-1.51452	1.99233e-10	1.38048e-10	ACSS1
84626	0.69	0.255	-1.48534	3.00337e-08	2.32987e-08	KRBA1
84629	9.77	3.95	-1.41421	2.86924e-230	1.56536e-231	TNRC18
84645	3.975	1.975	-1.03296	5.25265e-11	3.53304e-11	C22orf23
84691	0.385	0.075	-2.57023	8.102e-05	8.03904e-05	FAM71F1
84733	23.355	9.24	-1.3787	2.04094e-217	1.16706e-218	CBX2
84750	2.145	0.55	-1.92659	1.23944e-27	4.73699e-28	FUT10
8476	18.685	7.195	-1.33212	0	0	CDC42BPA
84842	8.3	2.32	-1.83697	7.29842e-52	1.65446e-52	HPDL
84861	3.32	1.245	-1.24926	1.11132e-22	4.90552e-23	KLHL22
84874	1.535	0.62	-1.32923	5.5709e-22	2.50863e-22	ZNF514
84892	7.815	2.93	-1.41411	4.16172e-48	1.01322e-48	POMGNT2
84913	0.36	0.14	-1.84324	7.26478e-07	6.15283e-07	ATOH8
84934	16.55	7.235	-1.21313	3.86532e-63	7.4315e-64	RITA1
84939	12.855	5.01	-1.43045	3.86608e-115	4.2466e-116	MUM1
84940	6.075	2.395	-1.32141	1.12404e-30	3.96471e-31	CORO6
84962	43.95	13.185	-1.74675	0	0	AJUBA
85002	2.855	1.24	-1.16658	5.57488e-13	3.4375e-13	FAM86B1
85015	3.625	1.825	-1.03884	1.29977e-24	5.40174e-25	USP45
8526	4.17	2.575	-1.01459	3.96922e-39	1.15164e-39	DGKE
8535	48.83	22.61	-1.11407	1.94151e-218	1.10171e-219	CBX4
85397	0.375	0.045	-2.94462	7.74737e-13	4.80646e-13	RGS8
85414	8.7	3.955	-1.12499	1.22858e-47	3.01444e-48	SLC45A3
8542	24.89	11.39	-1.1352	2.03965e-119	2.15114e-120	APOL1
85462	7.57	3.77	-1.00689	1.95202e-69	3.43405e-70	FHDC1
8578	1.365	0.665	-1.00389	2.05274e-06	1.78916e-06	SCARF1
8604	2.395	0.52	-2.23319	1.92246e-35	6.05181e-36	SLC25A12
8632	0.32	0.13	-1.56575	1.81231e-11	1.19177e-11	DNAH17
8654	0.6	0.215	-1.46339	1.00726e-11	6.5473e-12	PDE5A
87	406.815	175.245	-1.20555	0	0	ACTN1
8705	1	0.39	-1.3545	3.88381e-05	3.73522e-05	B3GALT4
8706	2.635	1.14	-1.21327	6.19511e-18	3.15933e-18	B3GALNT1
8718	8.195	3.715	-1.19438	5.17497e-23	2.26089e-23	TNFRSF25
8869	2.77	1.33	-1.0698	1.44015e-11	9.42838e-12	ST3GAL5
8941	0.67	0.185	-1.852	2.80068e-07	2.31522e-07	CDK5R2
89832	0.355	0.205	-1.05055	7.99741e-05	7.92827e-05	CHRFAM7A
89853	1.105	0.345	-2.2102	1.30205e-18	6.49576e-19	MVB12B
89884	0.84	0.365	-1.19632	8.97942e-10	6.42485e-10	LHX4
89886	1.125	0.58	-1.42584	1.38019e-07	1.11578e-07	SLAMF9
89890	2.55	0.805	-1.65536	7.28823e-41	2.03382e-41	KBTBD6
90075	4.32	2.14	-1.01406	3.25134e-17	1.70126e-17	ZNF30
90120	27.565	13.01	-1.08628	8.69956e-123	8.93399e-124	C9orf69
90203	3.195	1.33	-1.54369	1.76766e-24	7.38493e-25	SNX21
90423	0.645	0.315	-1.3858	1.60509e-05	1.49802e-05	ATP6V1E2
90527	0.53	0.245	-1.13922	0.000765882	0.000830762	DUOXA1
90668	0.17	0.055	-1.67332	0.000894122	0.000978995	CARMIL3
90827	0.16	0	-4.46035	0.00072817	0.000787944	ZNF479
9110	3.605	1.28	-1.49145	2.48707e-55	5.3041e-56	MTMR4
91107	46.135	20.725	-1.16814	4.46842e-161	3.49377e-162	TRIM47
9119	8.895	2.08	-2.09477	2.20604e-77	3.50764e-78	KRT75
91461	33.855	12.685	-1.41517	1.07521e-199	6.79138e-201	PKDCC
91694	4.22	1.69	-1.33919	1.94641e-33	6.39409e-34	LONRF1
91748	17.71	7.51	-1.22446	2.36516e-252	1.18685e-253	ELMSAN1
91775	1.275	0.63	-1.0083	1.13348e-16	6.02514e-17	NXPE3
9187	1.09	0.445	-1.40718	1.13873e-12	7.10124e-13	SLC24A1
91893	1.52	0.705	-1.10028	7.69922e-09	5.76717e-09	FDXACB1
9203	5.425	2.84	-1.07529	3.98667e-45	1.02294e-45	ZMYM3
9215	6.885	2.66	-1.31086	4.04728e-57	8.38944e-58	LARGE
9223	11.9	4.705	-1.36139	9.06394e-200	5.71184e-201	MAGI1
92312	2.52	0.955	-1.40114	3.2439e-37	9.80466e-38	MEX3A
9283	1.025	0.38	-1.39002	2.81822e-09	2.0625e-09	GPR37L1
92922	3.215	1.46	-1.13282	1.95558e-14	1.13251e-14	CCDC102A
92999	1.745	0.525	-1.72902	1.09316e-31	3.76013e-32	ZBTB47
93010	10.42	3.045	-1.76502	2.38285e-120	2.49572e-121	B3GNT7
9308	0.7	0.095	-2.86717	8.50534e-11	5.77918e-11	CD83
9322	47.595	23.66	-1.00516	6.74724e-131	6.51567e-132	TRIP10
9351	22.615	11.03	-1.1294	2.56923e-89	3.59415e-90	SLC9A3R2
9372	3.95	1.725	-1.10331	4.05643e-36	1.25505e-36	ZFYVE9
9466	13.075	6.14	-1.08879	1.27967e-55	2.71605e-56	IL27RA
9469	0.23	0.085	-1.2864	5.74973e-05	5.6237e-05	CHST3
9475	17.91	8.06	-1.1372	1.60751e-240	8.44174e-242	ROCK2
9476	0.65	0.21	-1.49428	0.00056494	0.000603815	NAPSA
9536	0.845	0.345	-1.30955	0.000151473	0.000153455	PTGES
9545	5.875	1.795	-1.70866	4.13628e-79	6.43195e-80	RAB3D
9560	11.305	2.385	-2.26973	1.05876e-34	3.38696e-35	CCL4L2
9603	17.04	6.39	-1.41439	1.81255e-149	1.50445e-150	NFE2L3
9610	0.86	0.39	-1.13336	3.89164e-05	3.74389e-05	RIN1
9641	4.635	1.785	-1.3785	1.45999e-37	4.37448e-38	IKBKE
9649	25.255	9.055	-2.00645	0	0	RALGPS1
9672	20.75	7.875	-1.39854	4.97171e-240	2.61811e-241	SDC3
9679	5.835	1.47	-1.98526	2.87466e-128	2.85987e-129	FAM53B
9683	7.31	3.49	-1.06468	1.60559e-79	2.49436e-80	N4BP1
9721	9.325	2.855	-1.30774	5.25102e-86	7.62918e-87	GPRIN2
9755	4.385	1.99	-1.15828	1.14774e-28	4.27268e-29	TBKBP1
9783	0.855	0.395	-1.10391	2.55718e-11	1.69428e-11	RIMS3
9846	3.47	1.385	-1.32298	3.07757e-46	7.73963e-47	GAB2
9848	0.285	0.08	-1.77312	3.45005e-08	2.69098e-08	MFAP3L
9895	3.675	1.205	-1.67701	6.28869e-86	9.15517e-87	TECPR2
9993	31.74	15.17	-1.06497	2.29822e-215	1.32423e-216	DGCR2
